1 **Mycobacteria-specific CD4<sup>+</sup>IFN- $\gamma$ <sup>+</sup> cell expresses naïve-surface markers and confers**  
2 **superior protection against tuberculosis infection compared to central and effector memory**  
3 **CD4<sup>+</sup> T cell subsets**

4 Jinyun Yuan<sup>1</sup>, Janice Tenant<sup>1</sup>, Thomas Pacatte<sup>1</sup>, Christopher Eickhoff<sup>1</sup>, Azra Blazevic<sup>1</sup>, Daniel  
5 F. Hoft<sup>1</sup>, Soumya Chatterjee<sup>1</sup>

6

7 <sup>1</sup>Division of Infectious Diseases, Allergy and Immunology, Department of Internal Medicine, St  
8 Louis University, St Louis, MO

9

10 Key words: tuberculosis immunology, CD4<sup>+</sup> memory, Tuberculosis vaccine, Cell-mediated  
11 immunity to tuberculosis, T cell memory

12

13 Running title: Superior anti-TB immunity by naïve marker expressing CD4<sup>+</sup> memory T cell

14

15

16

17

18

19

20

21

22 **Abstract**

23 Failure of the most recent tuberculosis (TB) vaccine trial to boost BCG mediated anti-TB  
24 immunity despite highly durable Th1-specific central ( $T_{CM}$ ) and effector ( $T_{EM}$ ) memory cell  
25 responses, highlights the importance of identifying optimal T cell targets for protective vaccines.  
26 Here we describe a novel, *Mycobacterium tuberculosis* (Mtb)-specific IFN- $\gamma^+$ CD4 $^+$  T cell  
27 population expressing surface markers characteristic of naïve T cells ( $T_{NLM}$ ), that were induced  
28 in both human (CD45RA $^+$ CCR7 $^+$ CD27 $^+$ CD95 $^-$ ) and murine (CD62L $^+$ CD44 $^-$ Sca-1 $^+$ CD122 $^-$ )  
29 systems in response to mycobacteria. In BCG vaccinated subjects and those with latent TB  
30 infection,  $T_{NLM}$  cells, compared to bonafide naïve CD4 $^+$  T cells were identified by absence of  
31 CD95 expression and had increased expression CCR7 and CD27, the activation markers T-bet,  
32 CD69 and PD-1 and the survival marker CD74. Increased  $T_{NLM}$  frequencies were noted in the  
33 lung and spleen of wild type C57BL6 mice at 2 weeks after infection with Mtb, and  
34 progressively decreased at later time points, a pattern not seen in TNF- $\alpha^+$ CD4 $^+$  T cells expressing  
35 naïve cell surface markers. Importantly, adoptive transfer of highly purified  $T_{NLM}$  from  
36 vaccinated ESAT-6 $_{1-20}$ -specific TCR transgenic mice conferred superior protection against Mtb  
37 infection in Rag-/- mice when compared with total memory populations (central and effector  
38 memory cells). Thus,  $T_{NLM}$  cells may represent a memory T cell population that if optimally  
39 targeted may significantly improve future TB vaccine responses.

40

41

42

## 43 **Introduction**

44 Tuberculosis (TB) disease caused by *Mycobacterium tuberculosis* (Mtb) affects more than 10  
45 million and claims 1.5 million lives worldwide every year [1]. Mtb primarily infects lungs via  
46 the aerosol route and is the leading cause of death from a single infectious agent, ranking above  
47 HIV/AIDS. Bacillus Calmette–Guérin (BCG)-the only approved TB vaccine, is given in  
48 childhood but is poorly protective against adult onset TB [2, 3]. Studies in mouse models [4] and  
49 HIV patients [5] have shown that a lack of CD4<sup>+</sup> T cells leads to increased disease susceptibility.  
50 A failure of disease control is also seen with a genetic deficiency of IFN- $\gamma$  and IL-12 signaling  
51 [6]. Furthermore, mice specifically deficient in CD4<sup>+</sup> cells producing IFN- $\gamma$  (CD4<sup>+</sup>IFN- $\gamma$ <sup>+</sup>) are  
52 more susceptible to TB disease [7, 8]. Although studies have shown that CD4<sup>+</sup>IFN- $\gamma$ <sup>+</sup>  
53 independent mechanisms are also involved in protection [9, 10], development of an improved TB  
54 vaccine requires better understanding of the nature of an optimal CD4<sup>+</sup> and more specifically,  
55 CD4<sup>+</sup>IFN- $\gamma$ <sup>+</sup> response against Mtb. Furthermore, since recall or memory CD4<sup>+</sup> responses are  
56 necessary for vaccine efficacy, it is important to understand which Mtb-specific CD4<sup>+</sup> T cell  
57 memory subset provides optimal anti-Mtb immunity. BCG generates robust CD4<sup>+</sup> central (T<sub>CM</sub>)  
58 and (T<sub>EM</sub>) responses but fails to provide lasting immunity [11]. Additionally, the most recent TB  
59 vaccine (MVA85) trial that failed to improve TB-specific immunity despite induction of robust  
60 T<sub>CM</sub> + T<sub>EM</sub> responses [12, 13]. These findings beg the question—is there a different population of  
61 CD4<sup>+</sup> memory T cells that we should be targeting. Phenotypic, functional, and gene expression  
62 properties of these T-cell subsets suggest [14] that human memory T cell differentiation follows  
63 a linear progression. The continuum ranges from naïve (T<sub>N</sub>) to more differentiated memory  
64 subsets: central memory (T<sub>CM</sub>), then effector memory (T<sub>EM</sub>), and terminal effector (T<sub>TE</sub>) cells.  
65 Less-differentiated cells give rise to more differentiated progeny in response to frequency and

66 intensity of antigen stimulation. With increasing differentiation, memory T cells progressively  
67 acquire or lose specific functions. An emerging theme is that with increasing differentiation,  
68 higher effector function is gained at the price of shorter survival and proliferative capacity. It is  
69 thus reasonable to posit that a vaccine that generates a higher frequency of less differentiated  
70 memory populations might be more effective against Mtb re-challenge. It was recently shown  
71 that a memory T cell expresses surface markers characteristic of naïve T cells (CD45RA<sup>+</sup>CCR7<sup>+</sup>)  
72 demonstrates enhanced survival and self-renewal capacity (T<sub>SCM</sub>) [15, 16]. These cells have been  
73 detected in BCG vaccinated infected subjects [17]. We had previously identified Mtb antigen-  
74 specific cytokine production in a subset of CD95<sup>-</sup> early precursor cells with a naïve-like  
75 phenotype [18]. Here we describe a population of Mtb-antigen specific IFN- $\gamma$ <sup>+</sup>CD4<sup>+</sup> cells with a  
76 naïve phenotype (T<sub>NLM</sub>) that were induced in response to mycobacterial antigens and confer  
77 superior protection against Mtb infection.

## 78 **Results**

### 79 **T<sub>NLM</sub> cells produce cytokines in response to mycobacterial antigens**

80 To understand the profile of Mtb-specific memory CD4 T-cell responses, we cultured PBMCs  
81 from subjects with latent TB infection (LTBI) and Mtb unexposed (quantiFERON-TB Gold  
82 negative) healthy controls (HC). Cells were stimulated with Mtb antigens ESAT-6 or CFP-10  
83 overnight and the frequency of different memory subsets producing cytokines IFN- $\gamma$  and TNF- $\alpha$   
84 was assessed by multi-parametric flow cytometry. The gating strategy shown in Fig. S1. We  
85 defined different memory subsets by combination of surface markers CD45RA, CCR7, CD27,  
86 CD95: naïve T (T<sub>N</sub>) cells as CD45RA<sup>+</sup>CCR7<sup>+</sup>CD27<sup>+</sup>CD95<sup>-</sup>; T memory stem cells (T<sub>SCM</sub>) as  
87 CD45RA<sup>+</sup>CCR7<sup>+</sup>CD27<sup>+</sup>CD95<sup>+</sup>; central memory T cells (T<sub>CM</sub>) as CD45RA<sup>-</sup>CCR7<sup>+</sup>; effector

88 memory T ( $T_{EM}$ ) cells as  $CD45RA^-CCR7^-$ ; terminal effector T cells ( $T_{EMRA}$ ) as  $CD45RA^+CCR7^-$ .  
89 In the LTBI group, increased frequencies of Mtb Ag (ESAT-6 and CFP-10)  $IFN-\gamma^+$  frequencies  
90 were noted among overall  $CD4^+$  cells,  $T_{CM}$  and  $T_{EM}$  (expressed as net frequency to baseline),  
91 compared to HC (Figure 1a). In contrast, subjects with LTBI demonstrated higher  $TNF-\alpha^+$   
92 frequency within overall  $CD4^+$  and  $T_{EM}$  cells but not  $T_{CM}$  in response to ESAT-6 and CFP-10  
93 (Figure 1a).

94 Interestingly, in addition to known memory subsets, a significantly increased frequency of  $IFN-$   
95  $\gamma^+CD4^+$  was observed in subjects with LTBI within cells expressing naïve-surface markers  
96 ( $CD45RA^+CCR7^+CD27^+$ ) in response to ESAT-6 (Median net frequency [Fo] =0.01 vs 0,  
97  $p<0.05$ ) and CFP-10 (Fo =0.00363 vs 0,  $p=0.056$ ), when compared with HC. However, no such  
98 differences were noted in these cells for  $TNF-\alpha$  production in response to ESAT-6 (Fo =0.007 vs  
99 0.00773) and CFP-10 (Fo =0.00908 vs 0.00896). These results suggested an  $IFN-\gamma^+ CD4^+$   
100 “memory response” in cells expressing naïve surface markers. These cells were primarily  $CD95^-$   
101 and their “memory-like” behavior along with the expression of markers of naïve T cells, led us to  
102 call these  $IFN-\gamma^+CD4^+$  cells ‘naive like memory’ ( $T_{NLM}$ ).

103 To further examine Mtb antigen-driven recall responses within  $T_{NLM}$  cells, human PBMCs  
104 collected from BCG vaccinated subjects pre-vaccination and at 1 week, 1 month and 3 months  
105 post vaccination, were cultured with media alone or stimulated with a Mtb-specific peptide pool  
106 (kind gift from Dr. Cecilia Lindestam Arlehamn, La Jolla Institute) overnight. This panel of Mtb  
107 antigens was previously shown to elicit similar frequencies of Mtb-specific  $CD4$  T cell responses  
108 across diverse populations [19]. Data (Figure 1c) are presented as fold changes of Mtb peptide-  
109 induced frequencies of  $IFN-\gamma$ -producing  $CD4^+$  T cells comparing post-vaccination with pre-  
110 vaccination responses. Frequency of Mtb peptide induced total  $IFN\gamma^+CD4^+$  cells increased

111 overtime after BCG vaccine in all 4 individuals. Moreover, increased  $T_{NLM}$  frequencies were  
112 seen after BCG vaccination in response to Mtb peptides in 3 out of 4 volunteers.

113 Next, to determine if similar  $T_{NLM}$  response could be elicited in vitro, PBMCs from healthy PPD-  
114 /IGRA-HC were cultured with BCG for 2 or 4 days and then restimulated overnight with BCG.  
115 On BCG restimulation of PBMCs cultured with BCG, increased frequencies of  $T_{NLM}$  were seen  
116 in compared with BCG restimulation of cells that were medium rested. This was noted in cells  
117 cultured for 2 days ( $F_o = 0.01126$  vs  $0.0450$ ,  $p < 0.01$ ) or 4d ( $F_o = 0.0195$  vs  $0.0595$ ,  $p < 0.01$ ). A  
118 similar trend was noted in frequencies of overall  $IFN-\gamma^+ CD4^+$ ,  $IFN-\gamma^+ T_{CM}$  and  $IFN-\gamma^+ T_{EM}$  cells  
119 (Figure 1d). This suggested that BCG induced  $T_{NLM}$  cells exhibit BCG-specific recall similar to  
120  $IFN-\gamma^+ T_{CM}$  and  $IFN-\gamma^+ T_{EM}$  cells.

### 121 **$T_{NLM}$ cells have a unique activated phenotype**

122 To further characterize antigen-specific  $T_{NLM}$ , we compared the expression of different markers  
123 of T cell activation and survival on  $IFN-\gamma^-$  vs.  $IFN-\gamma^+ CD4^+$  memory T cell subsets. As shown in  
124 Figure 2, we compared  $IFN-\gamma^-$  naïve  $CD4^+$  T cells ( $T_N$ ) with  $T_{NLM}$ ,  $IFN-\gamma^-$  central memory T  
125 cells ( $T_{CM}$ ) with  $IFN-\gamma^+ T_{CM}$  ( $T_{CM-\gamma}$ ),  $IFN-\gamma^-$  effector memory cells ( $T_{EM}$ ) with  $IFN-\gamma^+ T_{EM}$  ( $T_{EM-\gamma}$ ) in  
126 subjects with LTBI (Figure 2) after overnight stimulation with ESAT-6. Expression levels of the  
127 activation markers CD69, CD25, FoxP3, PD-1, T-bet, survival markers CD74 and BCL-2 and  
128 phenotypic markers CCR7 and CD27 are depicted as geometric mean fluorescence intensity  
129 (gMFI). In addition, because a  $CD8^+ CD49d^+$   $IFN-\gamma^+$  memory T cell with naïve phenotype was  
130 recently described to increase with age, with the frequency of these cells correlating inversely  
131 with the residual capacity of the immune system to respond to new infections with age[20], we  
132 also measured CD49d expression on the various memory subsets.

133 Upon ESAT-6 stimulation,  $T_{NLM}$  compared to  $T_N$ , showed higher expression of CD69, CD25,  
134 PD1, T-bet, CCR7, CD27, CD25, CD74 and FoxP3, negligible expression of CD95 and no  
135 difference in expression of CD49d or Bcl-2 (Figure 2). We also compared expression of these  
136 markers between  $T_{NLM}$ ,  $T_{CM-\gamma}$  and  $T_{EM-\gamma}$ . Compared to  $T_{CM-\gamma}$  cells,  $T_{NLM}$  had lower expression  
137 of CD69 and PD1. Interestingly,  $T_{NLM}$  showed higher expression of CD25, and FoxP3 and lower  
138 expression of CD49d and Bcl-2 compared to  $T_{EM-\gamma}$ . This suggested that in patients with LTBI,  
139  $IFN-\gamma^+CD4^+$   $T_N$  ( $T_{NLM}$ ) cells expressed unique surface and activation markers in response to  
140 ESAT-6 compared to  $T_N$ ,  $T_{CM-\gamma}$  and  $T_{EM-\gamma}$ .

141 **In vivo, Mtb-specific  $T_{NLM}$  cells are  $CD62L^+CD44^-Sca-1^+CD22^-$  and are lost rapidly in the**  
142 **lung during Mtb infection**

143 We wanted to further ascertain the kinetics of Mtb antigen-specific frequencies of  $T_{NLM}$  cells  
144 during in vivo Mtb infection. C57BL/6 (B6) mice were aerosol challenged with 100 CFU of Mtb  
145 Erdman with Glas-Col inhalation exposure systems and lung, mediastinal lymphocyte node and  
146 spleen were harvested after 4wks. As expected, ESAT-6 tetramer positive CD4 T cells were  
147 detected in Mtb infected mice with higher frequencies of ESAT-6 Tet<sup>+</sup>CD4<sup>+</sup> presented in lung  
148 than that in spleen. To further analyze the percentage of memory subsets within ESAT-6<sup>+</sup>Tet<sup>+</sup>  
149 CD4 T cells, CD62L and CD44 were used to identify  $T_N$  ( $CD62L^+CD44^-$ ),  $T_{CM}$  ( $CD62L^+CD44^+$ ),  
150  $T_{EM}$  ( $CD62L^-CD44^+$ ) and  $T_{EFF}$  ( $CD62L^-CD44^-$ ) and Sca-1 and CD122 to identify  $T_{SCM}$   
151 ( $CD62L^+CD44^-Sca-1^+CD122^+$ ) (Fig. S2). Interestingly, the predominant ESAT-6 Tet<sup>+</sup>CD4<sup>+</sup> cells  
152 noted within the  $CD62L^+CD44^-$  population were cells expressing  $Sca-1^+CD22^-$  (Figure 3a).  
153 These cells were also the predominant  $IFN-\gamma^+$  population. In this model, therefore, we defined  
154  $T_{NLM}$  as  $IFN-\gamma^+CD62L^+CD44^-Sca-1^+CD22^-$ .

155 To further study the kinetics of Mtb-antigen-specific  $T_{NLM}$  during Mtb infection, the recall  
156 response of different memory ESAT-6-specific  $CD4^+$  subsets to ESAT-6<sub>1-20</sub> was assessed from  
157 Mtb infected ESAT-6 TCR transgenic mice at various time points up to 145 days after Mtb  
158 infection. In this mouse model, Mtb growth kinetics in both lung and spleen is similar to that in  
159 wild type B6 after aerosol challenge of Mtb showing progressive increase up to 2 weeks  
160 followed by gradual plateauing. Net frequencies of ESAT-6<sub>1-20</sub>-specific  $IFN-\gamma^+CD4^+$  peaked at  
161 day 56-post infection (p.i.) (Figure 3b), while  $TNF-\alpha^+CD4^+$  frequencies peaked at day 28 p.i. We  
162 then studied the different memory phenotypes making up the  $IFN-\gamma^+CD4^+$  and  $TNF-\alpha^+CD4^+$  cells  
163 at all time points prior to and after Mtb infection. As expected, low overall frequencies of ESAT-  
164 6-specific  $IFN-\gamma^+CD4^+$  T cell frequencies were seen both in the lung and spleen prior to  
165 infection. Following Mtb infection, both  $IFN-\gamma^+T_{EM}$  and  $TNF-\alpha^+T_{EM}$  cells increased over time  
166 However, the highest frequencies of ESAT-6-specific  $T_{NLM}$  were present at 14 days p.i. in both  
167 lung and spleen with low frequencies seen at all subsequent time points (Figure 3c). This pattern  
168 of the ESAT-6-specific  $T_{NLM}$  response was not seen in  $TNF-\alpha^+$  cells expressing naïve surface  
169 markers ( $CD62L^+CD44^-$ ), suggesting that  $T_{NLM}$  cells ( $IFN-\gamma^+CD62L^+CD44^-Sca-1^+CD22^-$ ) are a  
170 Mtb antigen-specific population involved in the  $IFN-\gamma$  but not in the  $TNF-\alpha^+$  producing  $CD4^+$  T  
171 cell response to Mtb infection.

172  **$T_{NLM}$  cells confer superior protection against Mtb infection compared to total memory cells**  
173 **( $T_{CM}+T_{EM}$ )**

174 To determine the capability of antigen-activated  $T_{NLM}$  to inhibit Mtb growth in vitro, equivalent  
175 cell numbers of purified total  $CD4$  and  $T_{NLM}$  ex vivo from ESAT-6 TCR transgenic mice or  
176 expanded with ESAT-6<sub>1-20</sub> peptide for 7d in vitro were co-cultured with Mtb infected BMDM  
177 (bone marrow derived macrophage) 1 day earlier. Cells were harvested after 3 days of co-culture.



178 After 3d, in BMDM cultures without CD4<sup>+</sup> T cells, a 10-fold increase in Mtb CFU was  
179 observed. Although there was a decrease in the Mtb load on adding CD4<sup>+</sup> cells to BMDMs  
180 (Figure 4a), we saw no difference in the degree of Mtb growth inhibition when we compared  
181 ESAT-6<sub>1-20</sub> peptide expanded total CD4<sup>+</sup> T cells to unexpanded total CD4<sup>+</sup> T cells. However,  
182 when purified T<sub>NLM</sub> were sorted from total CD4<sup>+</sup> T cells and put in culture with BMDMs, we  
183 saw significant inhibition of mycobacterial growth by peptide-exposed T<sub>NLM</sub> compared peptide  
184 unexposed T<sub>NLM</sub>.

185 To further define whether antigen-activated T<sub>NLM</sub> are important in protection from Mtb infection  
186 in vivo, equivalent cell numbers of purified total CD4, T<sub>NLM</sub>, and T<sub>MEM</sub> (T<sub>CM</sub>+T<sub>EM</sub>) ( $0.5-1 \times 10^6$ )  
187 from ESAT-6 TCR transgenic mice after ESAT-6<sub>1-20</sub> vaccination were adoptively transferred via  
188 tail vein injection into Rag<sup>-/-</sup> recipients who were challenged the following day with low dose  
189 (~100 cfu) Mtb. Regardless of the type of CD4 T cells transferred initially, almost all cells were  
190 found to be phenotypically T<sub>EM</sub> at 28 days post-infection. However, increased total CD4<sup>+</sup> and  
191 CD4<sup>+</sup>IFN- $\gamma$ <sup>+</sup> and CD4<sup>+</sup>TNF- $\alpha$ <sup>+</sup> cells were found in lung but not in spleen from mice receiving  
192 T<sub>NLM</sub> compared to those receiving total CD4<sup>+</sup> cells and T<sub>MEM</sub> (Figure 4b and 4c). More  
193 importantly, mice given T<sub>NLM</sub> had lower bacterial burdens (Median frequency= 50878 vs 293082,  
194 p<0.05) than mice receiving T<sub>MEM</sub> cells (Figure 4b). These results provide direct support for  
195 superior protection provided by T<sub>NLM</sub> compared to overall CD4 and T<sub>MEM</sub>.

196

197

198

## 199 **Materials and methods**

### 200 **Human subjects**

201 All individuals were examined and samples collected as part of registered protocols approved by  
202 the Institutional Review Board of Saint Louis University (SLU) School of Medicine (Protocol  
203 #22975 and 26527).

204 4 PPD negative and QuantiFERON TB Gold negative subjects were vaccinated with BCG and  
205 peripheral blood mononuclear cells (PBMCs) were collected pre-vaccination, 1 week, 1 month  
206 and 3 months post vaccination. Subjects with latent tuberculosis infection (LTBI) were defined  
207 as those with a positive Interferon Gamma Release Assay (T-spot or QuantiFERON TB Gold)  
208 test, no clinical features of active TB disease and no abnormal findings on chest X-ray. PBMCs  
209 from subjects with LTBI were collected prior to starting treatment with Isoniazid (pre-treatment)  
210 and at 3 months and 6 months after starting treatment.

### 211 **In vitro short stimulation of human PBMCs**

212 Cultures on PBMCs were performed to determine memory subsets and levels of intracellular  
213 cytokines. Briefly, cells were cultured in RPMI 1640, with 10% FBS with penicillin–  
214 streptomycin (100 U per 100 mg/ml), L-glutamine (2 mM) at  $1 \times 10^6$  cells/FACS tube in 500ul  
215 volume. PBMCs from BCG vaccinated volunteers were stimulated overnight with Mtb-specific  
216 peptide pool (obtained from Dr. Cecilia Lindestam Arlehamn, La Jolla Institute)[19] and PBMCs  
217 from LTBI and healthy controls (HC) were stimulated overnight with 10 $\mu$ g/mL ESAT-6,  
218 10 $\mu$ g/mL CFP-10 or positive control CytoStim (Miltenyi Biotec) in presence of 1 $\mu$ g/mL  
219  $\alpha$ CD28/CD49d co-stimulatory molecules and protein transport inhibitor GolgiStop<sup>TM</sup> (BD) was

220 added after 4hrs. PBMCs cultured with medium alone were served as unstimulated control. After  
221 stimulation, cells are harvested and stained with fluorochrome-conjugated antibodies.

## 222 **T cell phenotyping and cytokine production**

223 Gating was performed on live single CD4<sup>+</sup> T cells. Different memory subsets are defined by  
224 combination of presence and absence of surface markers CD45RA, CCR7, CD27, CD95: naïve  
225 (T<sub>N</sub> CD45RA<sup>+</sup>CCR7<sup>+</sup>CD27<sup>+</sup>CD95<sup>lo</sup>); T memory stem cells (T<sub>SCM</sub>  
226 CD45RA<sup>+</sup>CCR7<sup>+</sup>CD27<sup>+</sup>CD95<sup>hi</sup>); central memory (T<sub>CM</sub>, CD45RA<sup>-</sup>CCR7<sup>+</sup>); effector memory  
227 (T<sub>EM</sub>, CD45RA<sup>-</sup>CCR7<sup>-</sup>); terminal effector (T<sub>EMRA</sub>, CD45RA<sup>+</sup>CCR7<sup>-</sup>). Data are depicted as  
228 frequency of CD4<sup>+</sup> T cells expressing cytokines IFN- $\gamma$  or TNF- $\alpha$ . The gating strategy is  
229 presented in Supplemental Fig. 1. Baseline values following medium culture are depicted as  
230 absolute frequency, and frequencies following stimulation with antigens are depicted as net  
231 frequency (Antigen-stimulated condition – Unstimulated condition).

## 232 **Mouse strains**

233 C57BL/6 (B6) mice were purchased from The Jackson Laboratory (Bar Harbor, ME). ESAT-6  
234 TCR transgenic (Tg) mice expressing the  $\alpha\beta$ TCR specific for the IAb-presented ESAT-6<sub>1-20</sub>  
235 peptide were kindly provided by Dr. David L. Woodland (Trudeau Institute, Saranac Lake, NY).  
236 Rag1<sup>-/-</sup> mice on B6 background were kindly provided by Dr. Richard Di Paolo (Saint Louis  
237 University, St. Louis, MO). All mice were bred in house and maintained under specific  
238 pathogen-free conditions. Mtb infected mice (8–12 weeks old of sex matched) were housed at  
239 the Association for the Assessment and Accreditation of Laboratory Animal Care-approved  
240 BSL3 facility at the SLU per the National Research Council Guide for the Care and Use of  
241 Laboratory Animals and used in accordance with protocols established by the Institutional  
242 Animal Care and Use Committee of the Department of Comparative Medicine, SLU School of

243 Medicine. Sample sizes were based on previous experience, and sample size calculations were  
244 approved by the Saint Louis University Animal Care Committee following AAALAC guidelines  
245 and recommendations. Although no formal blinding was done, all key experimental results were  
246 reproducible in multiple experiments.

#### 247 **Aerosol infections and bacterial load determination**

248 *M. tuberculosis*, Erdman strain (TMCC 107) was grown from low-passage seed lots in  
249 Middlebrook liquid medium 7H9 (BD) containing 10% ADC (BD) and 0.05% Tween 80 to mid-  
250 log phase, then aliquoted and frozen at -70°C until use. Mice received aerosol infection with the  
251 Erdman strain of *M. tuberculosis* by using a Glas-Col aerosol generation device (Glass-Col,  
252 Terre Haute, IN) to deliver ~100 CFU/animal. To determine the bacterial load post infection, left  
253 lung and part of spleen from Mtb infected mouse were homogenized in 7H9 media with 0.05%  
254 Tween 80. 500µL of 1/5 diluted lung and undiluted spleen homogenate were then added to a  
255 MGIT tube and incubated in a BACTEC MGIT 320 (BD Diagnostics, Sparks, MD) liquid  
256 culture system until registered positive.

257 To convert time to positivity (TTP) to bacterial numbers (CFU), a standard curve was used. To  
258 produce the standard curve, 500µl of 10-fold dilutions of the mycobacterial strains spiked in  
259 mouse lung homogenate or 7H9 media with 0.05% Tween 80 were inoculated into the MGIT  
260 tubes, and TTP was plotted against CFU obtained from plating aliquots of the mycobacteria on  
261 7H11 agar plates containing 10 % OADC supplement (BD) and 0.5 % glycerol. A linear  
262 regression analysis was carried out using GraphPad Prism version 6, and the resulting equation  
263 was used to convert TTP to CFU. Data are presented here as total number of CFUs per sample,  
264 as determined by use of a standard curve (Fig. S3).

265

## 266 **Preparation of single-cell suspensions**

267 Spleens were smashed using the plunger end of a 3-c.c. syringe until completely dissociated.  
268 Lungs were cut into small pieces and incubated in RPMI medium containing collagenase XI (1  
269 mg/ml; Sigma-Aldrich) and type IV bovine pancreatic DNase (50 mg/ml; Sigma-Aldrich) during  
270 1hr at 37°C. The digested lungs were disrupted by gently pushing the tissue through a 40µM cell  
271 strainer. The lung and spleen single-cell suspension was lysed with red blood cells and washed  
272 for staining with appropriate fluorochrome-conjugated antibodies.

## 273 **In vitro intracellular Mtb growth inhibition assay**

274 To assess the capability of different memory subsets of ESAT-6-specific CD4 to inhibit  
275 intracellular Mtb growth in vitro, we had adapted mycobacterial growth inhibition assay  
276 (MGIA). Details of this method have been previously reported [21]. Briefly, mononuclear cells  
277 from the bone marrow of C57BL/6 mice were plated at  $5 \times 10^5$ /ml on 6-well plate in complete  
278 culture medium containing 50ng/ml M-CSF. At day 7, macrophages were harvested and seeded  
279 into 96- flat-bottom well plate at  $2 \times 10^4$ /well in 100 µL culture medium before infected with 100  
280 µL Mtb Erdman at MOI=0.5 overnight. During the same week, splenocytes from ESAT-6 TCR  
281 transgenic mice were stimulated with ESAT-6<sub>1-20</sub> 1 µg/mL. At day 8, antigen expanded culture  
282 and fresh splenocytes from ESAT-6 transgenic mice were sorted out CD4<sup>+</sup>, T<sub>NLM</sub>  
283 (CD4<sup>+</sup>CD62L<sup>+</sup>CD44<sup>-</sup>) by BD FACSAria IIIu.  $2 \times 10^5$  cells of each purified population were  
284 added to each well containing  $2 \times 10^4$  Mtb infected bone marrow derived macrophages (BMDM)  
285 (effector: target=10:1). At day 4, culture supernatants were carefully removed without disturbing  
286 the bottom cell layer and 100 µL 0.2% saponin were added to each well for 1hr at 37°C to lyse  
287 cells and release Mtb. Each cell lysate 100 µl was then added to a MGIT tube and incubated in a  
288 BACTEC MGIT 320 liquid culture system. Bacterial cfus were determined as described above.

## 289 **Adoptive transfer**

290 ESAT-6 Tg mice were subcutaneously vaccinated with 100 $\mu$ g ESAT-6<sub>1-20</sub> emulsified in 250 $\mu$ g  
291 dimethyl dioctadecylammonium bromide (DDA) with 25 $\mu$ g monophosphoryl lipid A (MPL) and  
292 25 $\mu$ g trehalose dicorynomycolate (TDM) three times at 2-week intervals. After 4wks,  
293 splenocytes from immunized mice were sorted out CD4<sup>+</sup>, T<sub>NLM</sub> (CD4<sup>+</sup>CD62L<sup>+</sup>CD44<sup>-</sup>Sca1-  
294 <sup>+</sup>CD122<sup>-</sup>) and T<sub>MEM</sub> (CD4<sup>+</sup>CD62L<sup>-</sup>CD44<sup>+</sup>, CD4<sup>+</sup>CD62L<sup>-</sup>CD44<sup>-</sup> and CD4<sup>+</sup>CD62L<sup>+</sup>CD44<sup>+</sup>) by  
295 flow cytometry. 5x10<sup>5</sup>-1x10<sup>6</sup> each purified cell population was adoptively transferred to Rag-/-  
296 mice by tail vein injection. Next day, all recipients were challenged with a low dose of Mtb  
297 Erdman (50-100 CFU/lung) by aerosol infection (Glas-Col). At 4wks of Mtb infection, lungs and  
298 spleens were removed from mice for bacterial cfu determination, cell culture with antigens and  
299 flow cytometry.

## 300 **Detection and recall response of Mtb-specific CD4 T cells**

301 PE-conjugated tetramers (ESAT-6 4-17: I-Ab) were obtained from the National Institutes of  
302 Health Tetramer Core Facility. Single cell lymphocyte preparations were stimulated with  
303 10 $\mu$ g/mL ESAT-6<sub>1-20</sub> peptide in present of GolgiPlug (BD) at 37°C for 6hrs and were stained  
304 with the tetramers and incubated at 37°C for 1 h before surface and intracellular staining.

## 305 **Flow cytometry analysis**

306 Single cell suspensions were stained for surface markers at 4°C for 30 mins. For intracellular  
307 staining, cells were further incubated with intracellular fixation & permeabilization buffer  
308 (eBioscience) and followed by staining intracellular proteins in permeabilization buffer  
309 (eBioscience) for 30 mins at 4°C. LIVE/DEAD™ Fixable Dead Cell Stain Kit (Life Technology)  
310 was used to determine the viability of cells prior to the fixation and permeabilization required for

311 intracellular antibody staining. Purified anti-mouse CD16/CD32 mAb (BD Biosciences) and  
312 Human FcR Blocking Reagent (Miltenyi Biotec) were used to prevent nonspecific binding of  
313 Abs to the Fc receptors.

#### 314 **Data acquisition and analysis**

315 Data from stained cells were acquired using BD LSRFortessa X-20 and FACSDiva software (BD  
316 Biosciences) and were analyzed using FlowJo software (TreeStar). Statistical analysis and  
317 graphical representation of data were done using GraphPad Prism software. Median frequencies  
318 were used for measures of central tendency. Statistical significance was determined by Mann-  
319 Whitney or Wilcoxon test or Kruskal–Wallis test with Dunn multiple comparison test  
320 for multiple comparisons where indicated and denoted as \*,  $P \leq 0.05$ ; \*\*,  $P \leq 0.01$ ; \*\*\*,  $P$   
321  $\leq 0.001$ ; and \*\*\*\*,  $P \leq 0.0001$ .

322

## 323 **Discussion**

324 Our results suggest that  $\text{IFN-}\gamma^+\text{CD4}^+$  T a memory cell with naïve phenotype ( $T_{\text{NLM}}$ ) was part of  
325 the  $\text{CD4}^+$  recall response to mycobacterial antigens in subjects with LTBI as well as those  
326 vaccinated with BCG. This was not seen with  $\text{TNF-}\alpha^+\text{CD4}^+$  T cells in either human subjects with  
327 LTBI or a murine model during Mtb infection, suggesting that  $T_{\text{NLM}}$  can be identified by  $\text{IFN-}\gamma$   
328 production in response to Mtb. We found a unique expression profile of different phenotypic and  
329 activation markers in  $T_{\text{NLM}}$  cells in response to ESAT-6 when compared to  $T_{\text{N}}$  or to  $\text{IFN-}\gamma^+$   
330 memory populations i.e.  $T_{\text{CM-}\gamma}$  and  $T_{\text{EM-}\gamma}$ . In wild type C57BL/6 mice ESAT-6 tetramer positive  
331  $T_{\text{NLM}}$  were detected in Mtb infected mice and were  $\text{CD62L}^+\text{CD44}^- \text{Sca-1}^+\text{CD22}^-$ . Similar to BCG  
332 vaccinated subjects and those with LTBI,  $T_{\text{NLM}}$  were an important component of the  $\text{CD4}^+$   $\text{IFN-}$

333  $\gamma^+$  lung response prior to and at 2 weeks' post Mtb infection in an ESAT-6 TCR transgenic  
334 mouse model. Decrease in frequencies of ESAT-6-specific  $T_{NLM}$  with a concurrent increase in  
335  $T_{EM}$  cells were seen as Mtb bacterial loads peaked and then plateaued. Finally, ESAT-6-specific  
336  $T_{NLM}$  from vaccinated EAST-6 TCR transgenic mice, conferred superior protection against Mtb  
337 infection compared with total memory and effector T cells when adoptively transferred into Rag-  
338  $\text{-}$  mice.

339 It was recently shown that there is a subset of memory cells with enhanced survival and self-  
340 renewal capacity ( $T_{SCM}$ ) [22]. These cells express surface markers of nai□ve-cells  
341 ( $CD45RA^+CCR7^+$ ) along with memory marker CD95. In contrast to  $T_{EM}$ ,  $T_{SCM}$  can reconstitute  
342 the entire human memory T cell repertoire after bone marrow transplantation [23]. Remarkably,  
343 these cells persisted at stable frequencies 25 years after yellow fever vaccination while  $T_{EM}$  and  
344  $T_{CM}$  decreased over time [16]. Furthermore,  $CD45RA^+CCR7^+CD27^+Mtb\text{-Tetramer}^+$  positive  
345 cells were recently reported in human subjects with LTBI but not in healthy controls [24]. More  
346 than 50% of these tetramer positive cells were  $CD95^-$ . In that study,  $CFP10\text{-tetramer}^+T_{NLM}$  cells  
347 clustered with bulk  $CD4^+T_{SCM}$  cells and were distinct from bulk  $CD4^+T_N$  cells.  $Tetramer^+T_{NLM}$   
348 expressed significantly higher protein levels of CCR5, CCR6, CXCR3, granzyme A, granzyme  
349 K, and granulysin than bulk  $T_N$  cells.

350 We hypothesized that TB vaccines generating a high frequency of these  $CD4^+$  memory cells  
351 with “stem-cell” like properties might confer improved protection on Mtb challenge. Our results  
352 suggest that a  $CD4^+$  memory T cell population that expressed markers of nai□ve cells  
353 ( $CD45RA^+CCR7^+$ ) is part of the Mtb antigen-specific  $CD4^+IFN\text{-}\gamma^+$  but not  $CD4^+TNF\text{-}\alpha$   
354 memory response in subjects infected with Mtb or vaccinated by BCG. We and others have  
355 previously reported a mycobacteria-specific cytokine production by subset of naïve like cells



356 behaving similar to antigen experienced cells [17, 18] as well as their long term persistence after  
357 treatment of tuberculosis [25]. In the current study, compared to the IFN- $\gamma$  T<sub>N</sub>, T<sub>NLM</sub> expressed  
358 increased protein levels of markers of T cell activation CD69, PD-1 as well as T-bet. The  
359 expression level of these activation markers on T<sub>NLM</sub> were similar or lower than that expressed  
360 by T<sub>CM</sub>- $\gamma$ <sup>+</sup> and T<sub>EM</sub>- $\gamma$ <sup>+</sup>. In addition, T<sub>NLM</sub> compared to IFN- $\gamma$  T<sub>N</sub> had higher expression of HLA  
361 class II histocompatibility antigen gamma chain CD74 which has been implicated in memory T  
362 cell survival and homeostasis [26]. A naïve-like, subset was also recently identified in CD8+  
363 populations that increase with aging and respond to chronic viral infections. These cells termed  
364 CD8+ memory cells with naïve phenotype or CD8+T<sub>MNP</sub>, had high expression of CD49d relative  
365 to T<sub>N</sub>, T<sub>CM</sub> and T<sub>EM</sub>. However, we did not detect higher expression of CD49d on T<sub>NLM</sub> compared  
366 to the other subsets. These findings suggest that T<sub>NLM</sub> cannot be distinguished from IFN- $\gamma$  T<sub>N</sub>  
367 using CD49d. Interestingly, we saw higher expression of CD25 and FoxP3 expression on T<sub>NLM</sub>  
368 compared to T<sub>EM</sub>- $\gamma$ <sup>+</sup>. The implications of these results are unclear at this time but it has been  
369 suggested that IFN- $\gamma$  plays a major role in induction of Tregs and a fraction of these Tregs  
370 differentiate into Th1 cells after resolution of the immune response[27, 28]. We utilized the  
371 ESAT-6<sub>1-20</sub>/I-A<sup>b</sup>-specific TCR transgenic mouse to understand the kinetics of antigen-specific  
372 T<sub>NLM</sub>. This model has been previously used to study priming and activation of naïve T cells [29].  
373 It was shown previously demonstrated that high frequencies of CD62L<sup>+</sup> CD44<sup>+</sup> cells were present  
374 not only in the mediastinal lymph node and spleen but also in the lung of Mtb uninfected mice  
375 within 2 weeks after infection. In this study, we found high frequencies of T<sub>NLM</sub> but not TNF- $\alpha$ +  
376 CD4+ T cells expressing naïve surface markers prior at 2 weeks post infection. While T<sub>NLM</sub>  
377 frequencies progressively decreased over time as Mtb loads increased and plateaued, there were

378 negligible frequencies of these naïve-TNF- $\alpha^+$  cells throughout the course of infection further  
379 suggesting that T<sub>NLM</sub> response might be IFN- $\gamma$ -specific.

380 In a previous study bulk CD62L<sup>+</sup>CD44<sup>-</sup> CD4<sup>+</sup> T<sub>N</sub> cells from BCG vaccinated mice were found to  
381 provide superior protection against Mtb infection in Rag<sup>-/-</sup> mice compared to T<sub>EM</sub> [30].  
382 However, there was no direct evidence provided in that study that an Mtb-antigen-specific  
383 memory subset exists within total T<sub>N</sub> population. Since frequencies of tetramer positive T<sub>NLM</sub>  
384 were significantly lower compared to T<sub>CM</sub> or T<sub>EM</sub> we utilized vaccinated ESAT-6 TCR  
385 transgenic mouse to adoptively transfer antigen-specific CD4<sup>+</sup> T cell populations into Rag<sup>-/-</sup>  
386 mice. In addition, using an in vitro killing assay, we first confirmed that purified antigen exposed  
387 T<sub>NLM</sub> from ESAT-6 TCR transgenic mice lowered bacterial loads more efficiently than T<sub>NLM</sub>  
388 previously unexposed to antigen. The major population of T<sub>NLM</sub> transferred was CD62L<sup>+</sup>CD44<sup>-</sup>  
389 Sca-1<sup>+</sup>CD122<sup>-</sup>. In contrast to the previous study, we saw lowering of Mtb bacterial loads in the  
390 lungs but not in the spleens of Rag<sup>-/-</sup> mice given T<sub>NLM</sub> compared to those receiving ESAT-6-  
391 specific total memory population (T<sub>CM</sub>+ T<sub>EM</sub>).

392 Our study did not formally assess whether IFN- $\gamma$  production is essential for the protective role of  
393 T<sub>NLM</sub> against Mtb. This is especially relevant as it was shown recently that in mouse models IFN-  
394  $\gamma$  accounts for only ~30% of CD4 T cell-dependent cumulative bacterial control in the lungs and  
395 excess IFN- $\gamma$  production may exacerbate lung pathology [31]. Additionally, we assessed the  
396 kinetics of T<sub>NLM</sub> specific for ESAT-6 and recent data seems to suggest that T<sub>SCM</sub> specific for Mtb  
397 antigen Ag85B secrete primarily IL-2, while BCG and CFP-10 specific cells produced IFN- $\gamma$ ,  
398 TNF- $\alpha$  and IL-2 [24]. Although we found ESAT-6-specific T<sub>NLM</sub> showed superior protection  
399 against Mtb compared to conventional memory subsets, it is not known what antigen-  
400 specificities of T<sub>NLM</sub> need to be generated by a TB vaccine to generate optimal, durable CD4<sup>+</sup>

401 memory response. Finally, the low frequencies of these cells detected in the peripheral blood  
402 make it challenging to induce large number of these cells by vaccination. However, long-term  
403 proliferative potential of CD4<sup>+</sup> T cells after BCG vaccination was correlated with frequencies of  
404 BCG-specific stem cell like memory cells [24] suggesting that frequencies of these cells  
405 generated by a TB vaccine might be utilized as a marker of durable CD4<sup>+</sup> T cell responses.  
406 Thus, our findings add to the evolving new paradigm of CD4<sup>+</sup> memory T cells and have  
407 important implications for future rational vaccine design and host-directed therapy for  
408 tuberculosis.

409

410

411

412 **Fig.1** IFN- $\gamma$ <sup>+</sup>CD4<sup>+</sup> T<sub>N</sub> (T<sub>NLM</sub>) are induced in response to mycobacterial antigens. **(a)** Frequency  
413 of IFN- $\gamma$ <sup>+</sup> and TNF- $\alpha$ <sup>+</sup> cells on different CD4 T cell memory subsets in PBMCs from human  
414 subjects with latent TB infection (LTBI) and healthy controls (HC) after stimulated overnight  
415 with 10 $\mu$ g/mL CFP-10 or ESAT-6. Data are presented net frequencies of IFN- $\gamma$ -producing CD4<sup>+</sup>  
416 T cells from antigens stimulation culture compared with medium alone culture. Bar height  
417 represents median. P values were calculated using the Mann-Whitney test (\*p<0.05, \*\*p<0.01,  
418 \*\*\*p<0.001, \*\*\*\*p<0.0001). **(b)** Fold change of Mtb peptides-induced frequencies of IFN- $\gamma$ -  
419 producing CD4<sup>+</sup> T cells comparing post-vaccination (1week, 1month, 3month) with pre-  
420 vaccination in PBMCs from PPD negative and QuantiFERON TB Gold negative human subjects  
421 (V#1,2,3,4) vaccinated with BCG after stimulated overnight with Mtb-specific peptide pools. **(c)**  
422 Frequency of IFN- $\gamma$ <sup>+</sup> cells on different CD4 T cell memory subsets in PBMCs from HC after  
423 cultured with BCG or medium for 2d or4d following re-stimulated overnight with BCG. P values  
424 were calculated using the Wilcoxon test (\*p<0.05, \*\*p<0.01, \*\*\*p<0.001, \*\*\*\*p<0.0001).

425

426 **Fig.2**  $T_{NLM}$  exhibit distinct phenotypic and activation markers compared to  $T_N$ ,  $T_{CM}$  and  $T_{EM}$ .

427 Expression levels demonstrated as geometric mean fluorescence intensity (gMFI) of different

428 markers involved in T cell activation and function on  $T_N$ ,  $T_{NLM}$ ,  $T_{CM}$ ,  $IFN-\gamma^+T_{CM}$  ( $T_{CM-\gamma}$ ),  $T_{EM}$ ,

429 and  $IFN-\gamma^+T_{EM}$  ( $T_{EM-\gamma}$ ) in PBMCs from LTBI after overnight stimulated with EAT-6. Horizontal

430 lines indicate the mean (+SEM). P values were calculated using the Wilcoxon test between  $T_N$

431 and  $T_{NLM}$ ,  $T_{EM}$  and  $T_{EM-\gamma}$ ,  $T_{CM}$  and  $T_{CM-\gamma}$  and the Mann-Whitney test between  $T_{NLM}$  and  $T_{EM-\gamma}$ ,

432  $T_{NLM}$  and  $T_{CM-\gamma}$  (\* $p < 0.05$ , \*\* $p < 0.01$ , \*\*\* $p < 0.001$ , \*\*\*\* $p < 0.0001$ ). Dunn's correction was

433 used for multiple comparisons.

434 **Fig.3** ESAT-6-specific  $T_{NLM}$  are present prior to and at early stages of Mtb infection. (a)

435 Memory phenotype of ESAT-6 tetramer<sup>+</sup>  $CD4^+$  T cells from Mtb infected B6 mice. (b)

436 Frequency of ESAT-6-specific  $IFN-\gamma^+$  and  $TNF-\alpha^+$   $CD4^+$  T cells in lungs and spleens at different

437 time points after Mtb infection in ESAT-6 TCR transgenic mice after re-stimulation with

438 10 $\mu$ g/mL ESAT-6<sub>1-20</sub> for 6 hours ex vivo. (c) The memory subsets of ESAT-6-specific  $IFN-\gamma^+$

439 and  $TNF-\alpha^+$   $CD4^+$  T cells present in the lung and the spleen at the various time points shown in

440 (b).

441 **Fig.4** ESAT-6-specific  $T_{NLM}$  provide superior protection against TB infection in mice compared

442 to total memory cells. (a) Mtb CFUs in Mtb infected BMDMs co-cultured with purified ESAT-

443 6-specific  $T_{NLM}$  ( $CD4^+CD62L^+CD44^-Sca1^-CD122^-$ ) and  $CD4$  directly ex vivo or expanded with

444 ESAT-6<sub>1-20</sub> for 7d from ESAT-6 TCR transgenic mice. (b) Mtb CFUs in lungs and spleens from

445 Rag<sup>-/-</sup> mice receiving purified ESAT-6-specific  $CD4$ ,  $T_{NLM}$  ( $CD4^+CD62L^+CD44^-Sca1^-CD122^-$ )

446 and  $T_{MEM}$  ( $CD4^+CD62L^-CD44^+$ ,  $CD4^+CD62L^-CD44^-$  and  $CD4^+CD62L^+CD44^+$ ) 30d after Mtb

447 infection. (c) Total  $CD4^+$ , ESAT-6-specific  $IFN-\gamma^+CD4^+$ , ESAT-6-specific  $TNF-\alpha^+CD4^+$  T cell

448 counts in lungs and spleens recovered from mice in (b). The data are representative of two  
449 independent experiments of similar design. Horizontal lines indicate the median. P values were  
450 calculated using the Mann-Whitney test (\* $p < 0.05$ , \*\* $p < 0.01$ , \*\*\* $p < 0.001$ , \*\*\*\* $p < 0.0001$ ).

451

452

453

454

455

456

457

458

459

460

461

462

463

464

465

466

467

468

## 469 **References:**

470

- 471 1. WHO, *Global tuberculosis report 2017*. 2017.
- 472 2. Andersen, P. and T.M. Doherty, *The success and failure of BCG - implications for a*  
473 *novel tuberculosis vaccine*. Nat Rev Microbiol, 2005. **3**(8): p. 656-62.
- 474 3. Trunz, B.B., P. Fine, and C. Dye, *Effect of BCG vaccination on childhood tuberculous*  
475 *meningitis and miliary tuberculosis worldwide: a meta-analysis and assessment of cost-*  
476 *effectiveness*. Lancet, 2006. **367**(9517): p. 1173-80.
- 477 4. Mogues, T., et al., *The Relative Importance of T Cell Subsets in Immunity and*  
478 *Immunopathology of Airborne Mycobacterium tuberculosis Infection in Mice*. The  
479 Journal of Experimental Medicine, 2001. **193**(3): p. 271-280.
- 480 5. Kwan, C.K. and J.D. Ernst, *HIV and tuberculosis: a deadly human syndemic*. Clin  
481 Microbiol Rev, 2011. **24**(2): p. 351-76.
- 482 6. Flynn, J.L., *An essential role for interferon gamma in resistance to Mycobacterium*  
483 *tuberculosis infection*. Journal of Experimental Medicine, 1993. **178**(6): p. 2249-2254.
- 484 7. Green, A.M., R. DiFazio, and J.L. Flynn, *IFN- $\gamma$  from CD4 T cells is essential for host*  
485 *survival and enhances CD8 T cell function during Mycobacterium tuberculosis infection*.  
486 Journal of immunology (Baltimore, Md. : 1950), 2013. **190**(1): p. 270-277.
- 487 8. Chackerian, A.A., T.V. Perera, and S.M. Behar, *Gamma Interferon-Producing CD4(+) T*  
488 *Lymphocytes in the Lung Correlate with Resistance to Infection with Mycobacterium*  
489 *tuberculosis*. Infection and Immunity, 2001. **69**(4): p. 2666-2674.
- 490 9. Gallegos, A.M., et al., *A gamma interferon independent mechanism of CD4 T cell*  
491 *mediated control of M. tuberculosis infection in vivo*. PLoS Pathog, 2011. **7**(5): p.  
492 e1002052.
- 493 10. Orr, M.T., et al., *Interferon gamma and Tumor Necrosis Factor Are Not Essential*  
494 *Parameters of CD4+ T-Cell Responses for Vaccine Control of Tuberculosis*. J Infect Dis,  
495 2015. **212**(3): p. 495-504.
- 496 11. Soares, A.P., et al., *Longitudinal changes in CD4(+) T-cell memory responses induced by*  
497 *BCG vaccination of newborns*. J Infect Dis, 2013. **207**(7): p. 1084-94.
- 498 12. Tameris, M., et al., *The candidate TB vaccine, MVA85A, induces highly durable Th1*  
499 *responses*. PLoS One, 2014. **9**(2): p. e87340.
- 500 13. Tameris, M.D., et al., *Safety and efficacy of MVA85A, a new tuberculosis vaccine, in*  
501 *infants previously vaccinated with BCG: a randomised, placebo-controlled phase 2b*  
502 *trial*. The Lancet, 2013. **381**(9871): p. 1021-1028.
- 503 14. Mahnke, Y.D., et al., *The who's who of T-cell differentiation: Human memory T-cell*  
504 *subsets*. European Journal of Immunology, 2013. **43**(11): p. 2797-2809.
- 505 15. Gattinoni, L., et al., *A human memory T cell subset with stem cell-like properties*. Nat  
506 Med, 2011. **17**(10): p. 1290-7.
- 507 16. Fuertes Marraco, S.A., et al., *Long-lasting stem cell-like memory CD8+ T cells with a*  
508 *naive-like profile upon yellow fever vaccination*. Sci Transl Med, 2015. **7**(282): p.  
509 282ra48.

- 510 17. Soares, A.P., et al., *Bacillus Calmette-Guerin vaccination of human newborns induces T*  
511 *cells with complex cytokine and phenotypic profiles.* J Immunol, 2008. **180**(5): p. 3569-  
512 77.
- 513 18. Chatterjee, S., et al., *Filarial Infection Modulates the Immune Response to*  
514 *Mycobacterium tuberculosis through Expansion of CD4+ IL-4 Memory T Cells.* The  
515 Journal of Immunology, 2015. **194**(6): p. 2706-2714.
- 516 19. Carpenter, C., et al., *A side-by-side comparison of T cell reactivity to fifty-nine*  
517 *Mycobacterium tuberculosis antigens in diverse populations from five continents.*  
518 Tuberculosis (Edinb), 2015. **95**(6): p. 713-721.
- 519 20. Pulko, V., et al., *Human memory T cells with a naive phenotype accumulate with aging*  
520 *and respond to persistent viruses.* Nat Immunol, 2016. **17**(8): p. 966-75.
- 521 21. Hoft, D.F., et al., *Investigation of the Relationships between Immune-Mediated Inhibition*  
522 *of Mycobacterial Growth and Other Potential Surrogate Markers of Protective*  
523 *Mycobacterium tuberculosis Immunity.* Journal of Infectious Diseases, 2002. **186**(10): p.  
524 1448-1457.
- 525 22. Lugli, E., et al., *Superior T memory stem cell persistence supports long-lived T cell*  
526 *memory.* The Journal of Clinical Investigation, 2013. **123**(2): p. 594-599.
- 527 23. Roberto, A., et al., *Role of naive-derived T memory stem cells in T-cell reconstitution*  
528 *following allogeneic transplantation.* Blood, 2015. **125**(18): p. 2855-64.
- 529 24. Mpande, C.A.M., et al., *Functional, Antigen-Specific Stem Cell Memory (TSCM) CD4+*  
530 *T Cells Are Induced by Human Mycobacterium tuberculosis Infection.* Frontiers in  
531 Immunology, 2018. **9**(324).
- 532 25. Kumar, N.P., et al., *Effect of standard tuberculosis treatment on naive, memory and*  
533 *regulatory T-cell homeostasis in tuberculosis–diabetes co-morbidity.* Immunology, 2016.  
534 **149**(1): p. 87-97.
- 535 26. Weng, N.-p., Y. Araki, and K. Subedi, *The molecular basis of the memory T cell*  
536 *response: differential gene expression and its epigenetic regulation.* Nature reviews.  
537 Immunology, 2012. **12**(4): p. 306-315.
- 538 27. Wood, K.J. and B. Sawitzki, *Interferon gamma: a crucial role in the function of induced*  
539 *regulatory T cells in vivo.* Trends Immunol, 2006. **27**(4): p. 183-7.
- 540 28. Daniel, V., et al., *Interferon-gamma producing regulatory T cells as a diagnostic and*  
541 *therapeutic tool in organ transplantation.* Int Rev Immunol, 2014. **33**(3): p. 195-211.
- 542 29. Reiley, W.W., et al., *ESAT-6-specific CD4 T cell responses to aerosol*  
543 *&lt;em>&lt;/em>Mycobacterium tuberculosis&lt;/em> infection are initiated in the*  
544 *mediastinal lymph nodes.* Proceedings of the National Academy of Sciences, 2008.  
545 **105**(31): p. 10961.
- 546 30. Kipnis, A., et al., *Memory T lymphocytes generated by Mycobacterium bovis BCG*  
547 *vaccination reside within a CD4 CD44<sup>lo</sup> CD62 ligand<sup>hi</sup> population.* Infect Immun,  
548 2005. **73**(11): p. 7759-64.
- 549 31. Sakai, S., et al., *CD4 T Cell-Derived IFN-gamma Plays a Minimal Role in Control of*  
550 *Pulmonary Mycobacterium tuberculosis Infection and Must Be Actively Repressed by*  
551 *PD-1 to Prevent Lethal Disease.* PLoS Pathog, 2016. **12**(5): p. e1005667.

552



**a**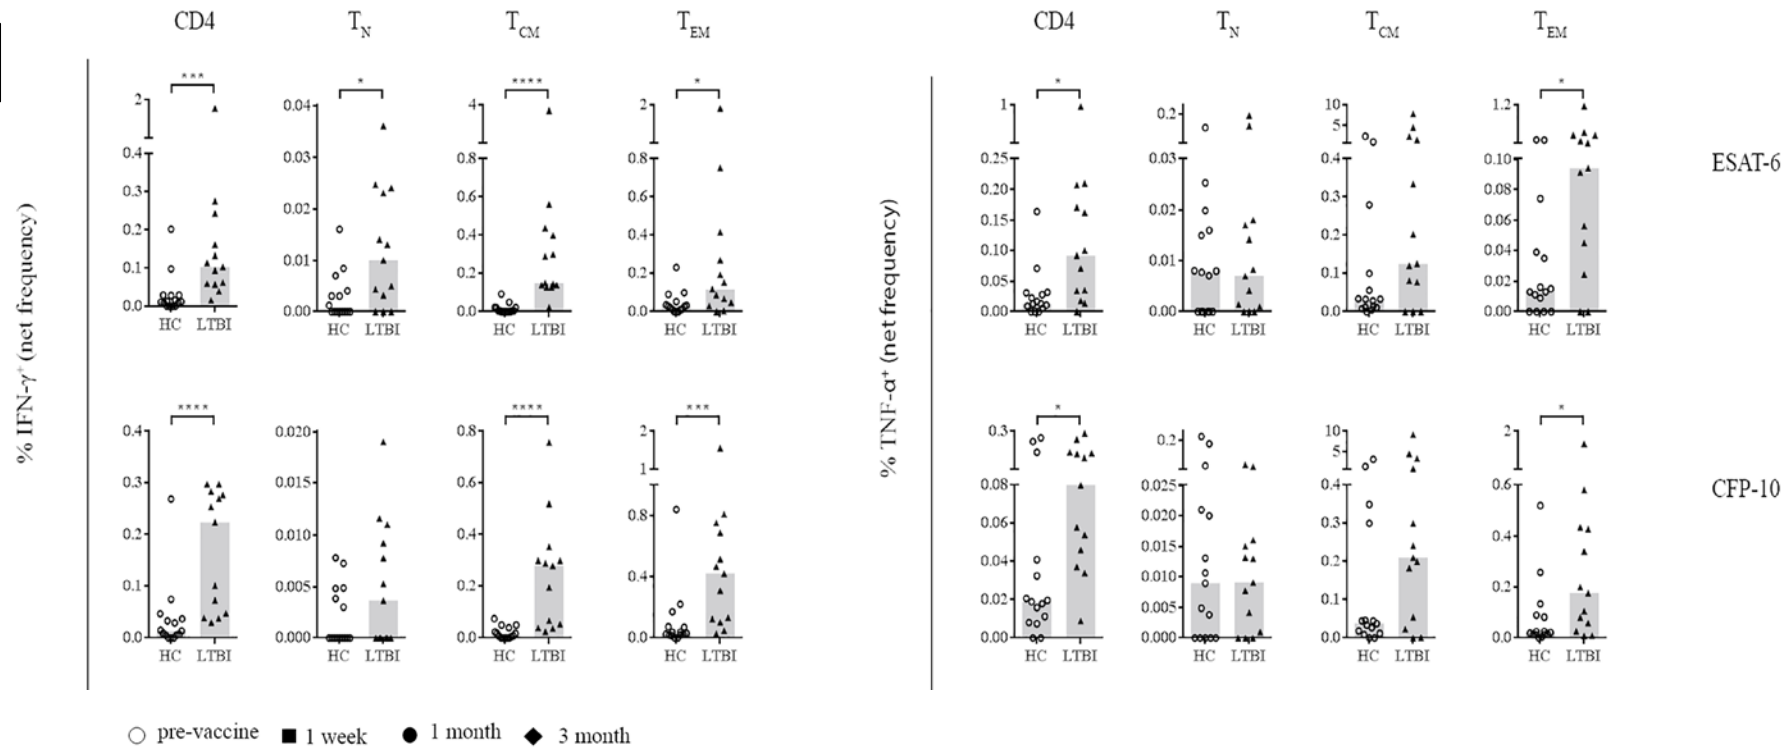**b**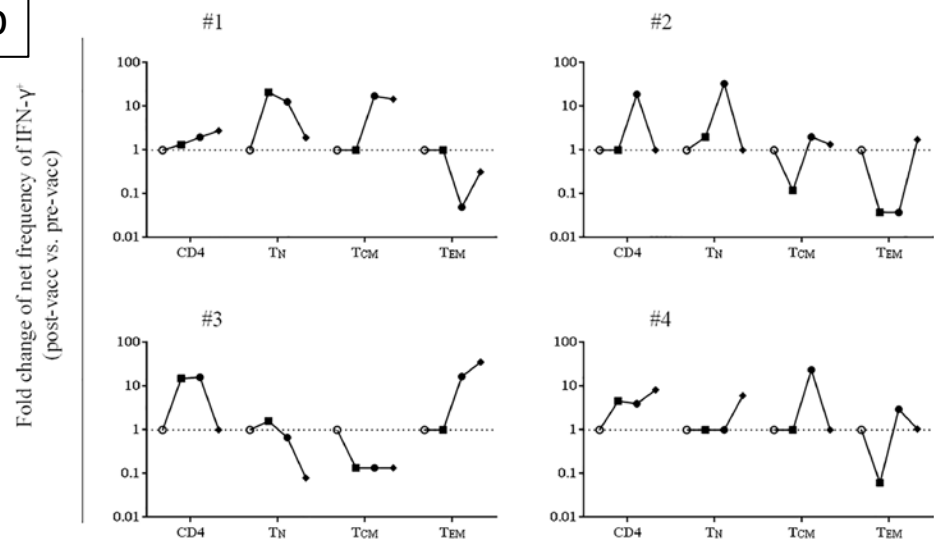**c**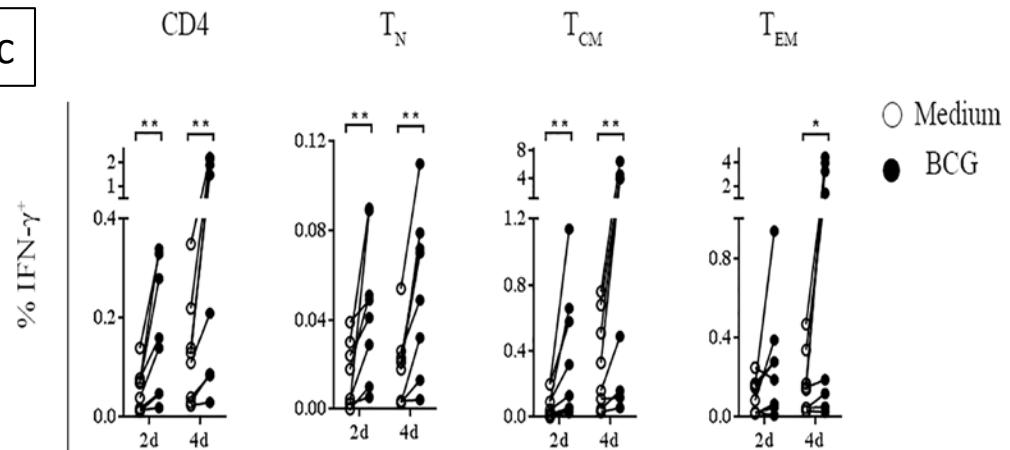



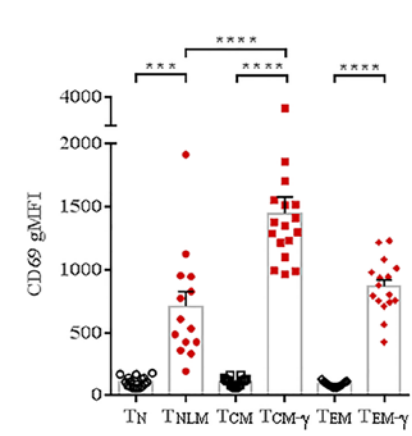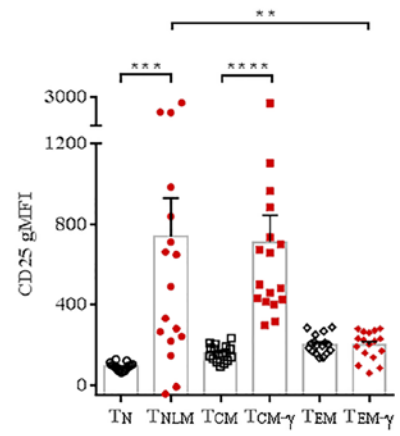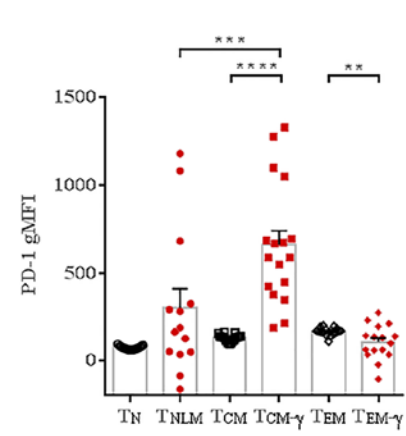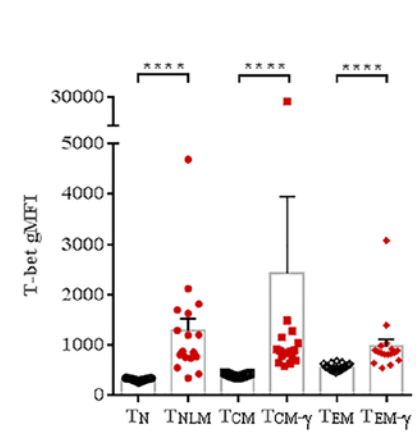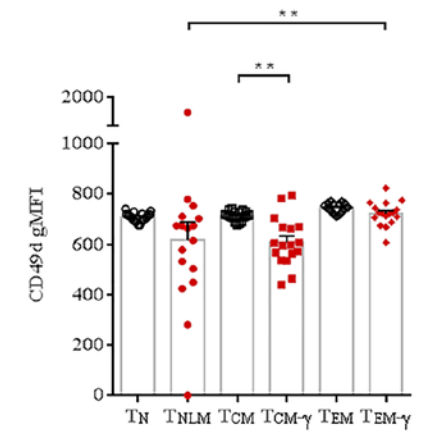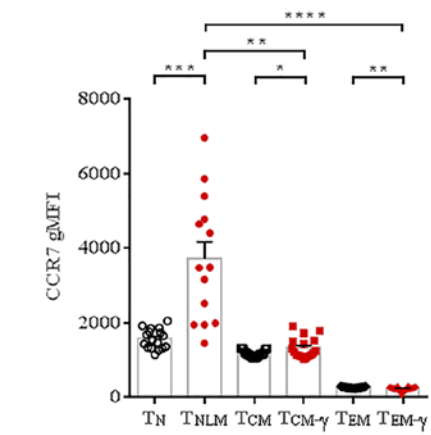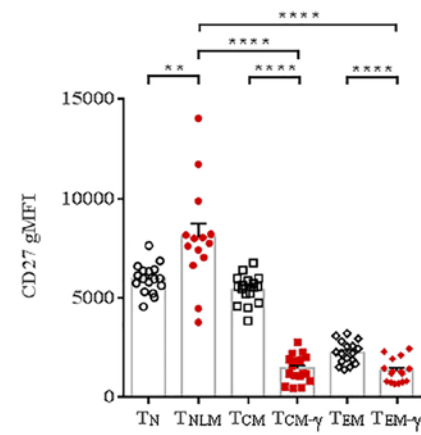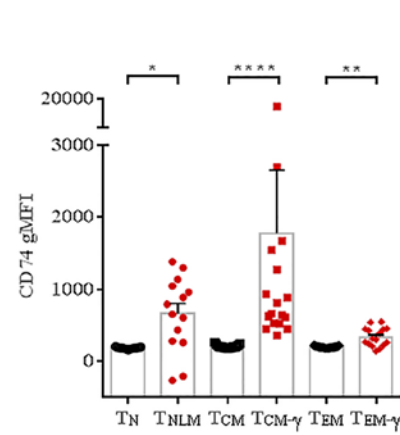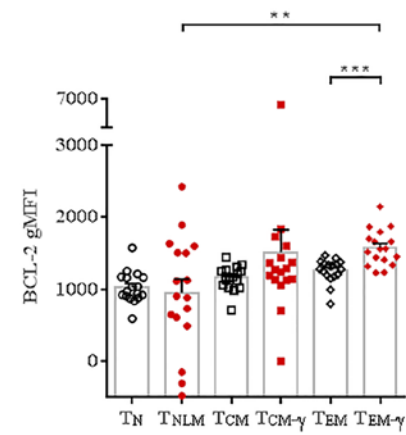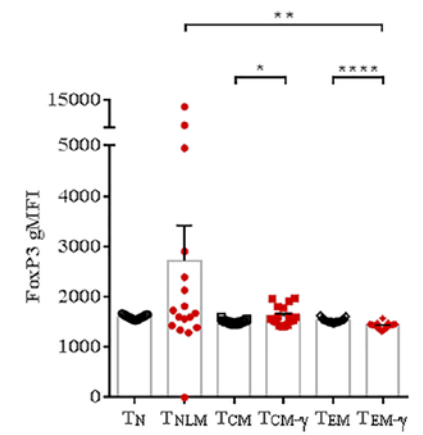

**a**

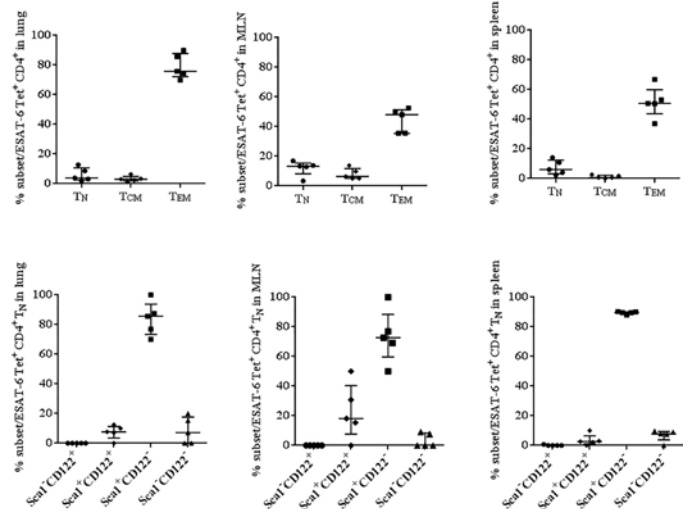

**b**

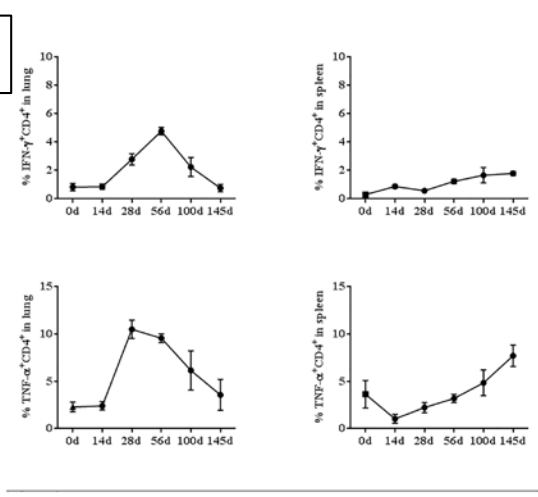

**c**

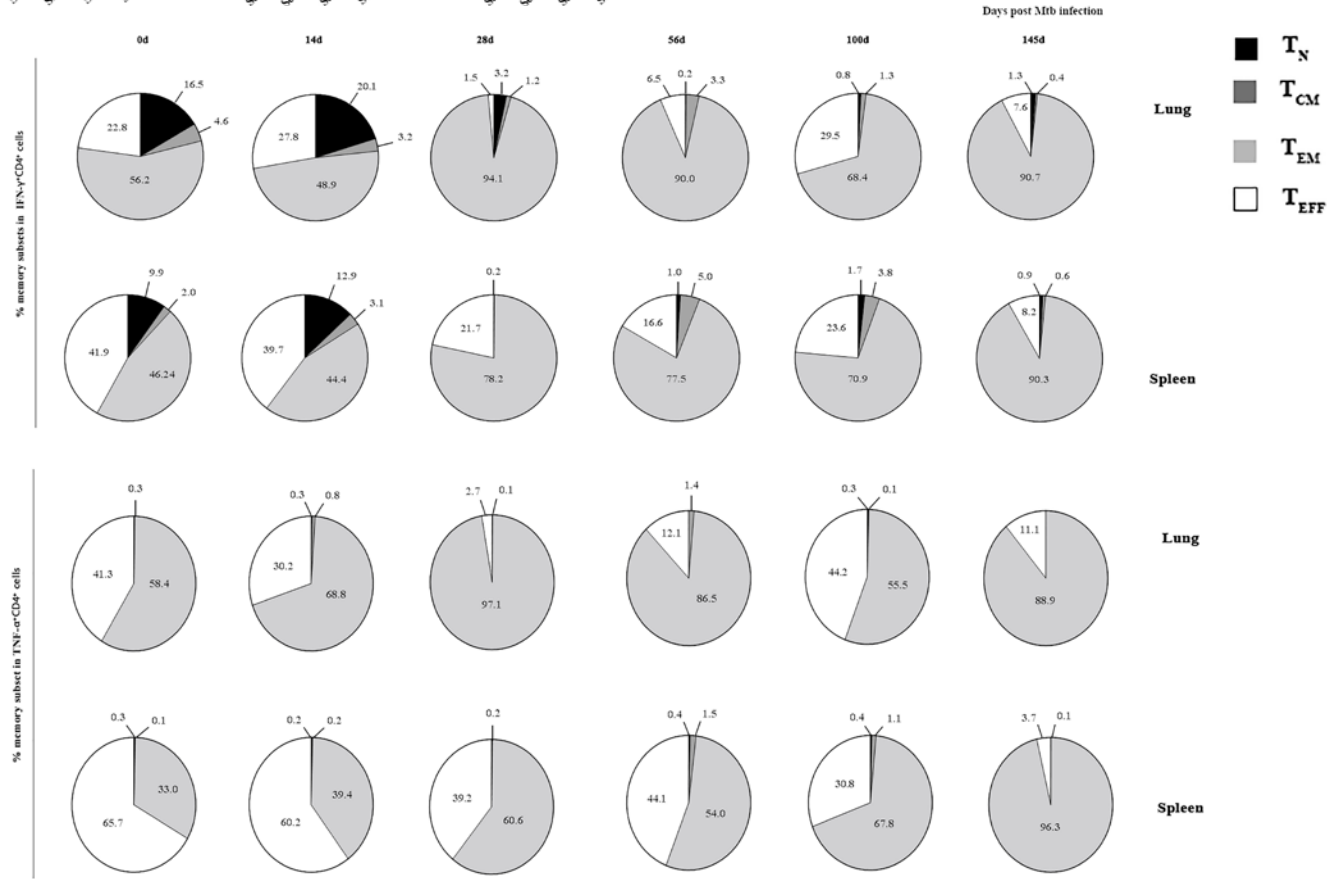

**a**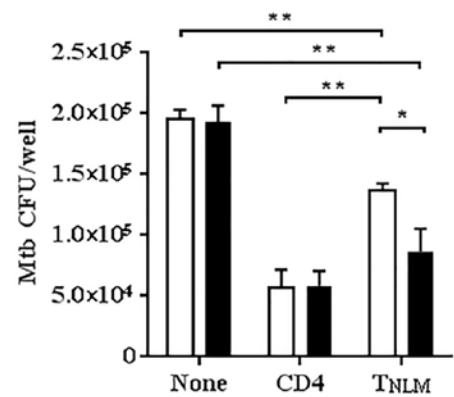**b**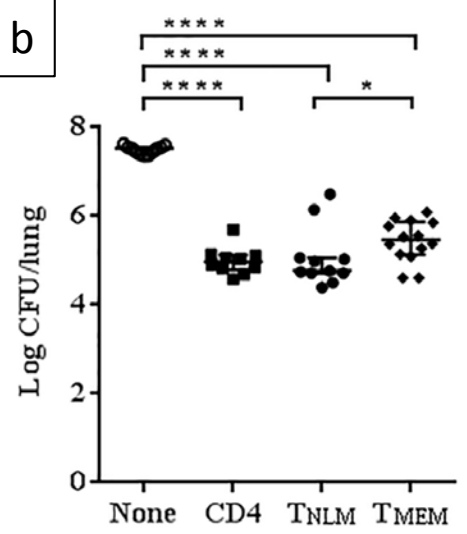**c**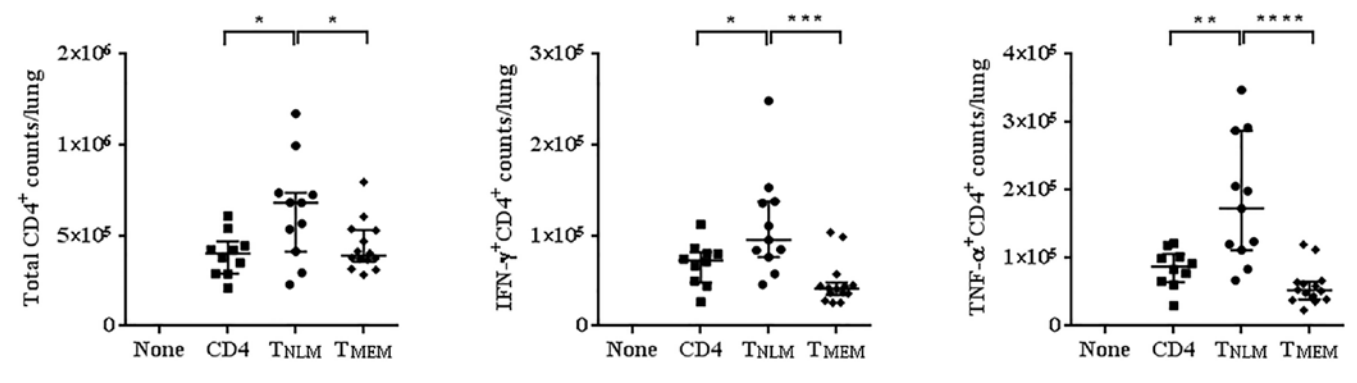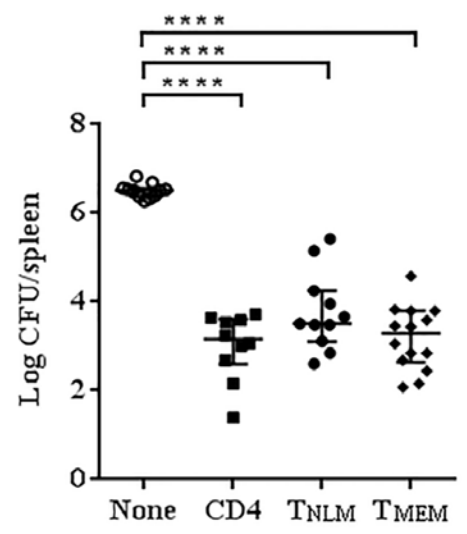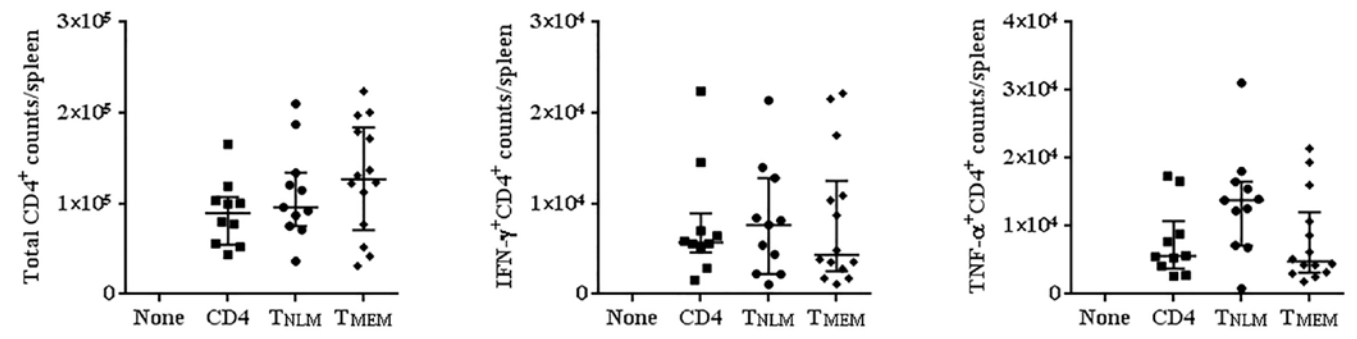

Source: https://www.biorxiv.org/content/10.1101/384784v2.full.pdf
